# Supplementary material for: SARS-CoV-2-Specific T Cell Responses Are Stronger in Children With Multisystem Inflammatory Syndrome Compared to Children With Uncomplicated SARS-CoV-2 Infection
Source: PubMed Central journal article supplement (PMC8803660; doi:10.3389/fimmu.2021.793197), 2022-01-18
Supplement: DataSheet_1.pdf [file DataSheet_1.pdf]

## Supplementary Materials

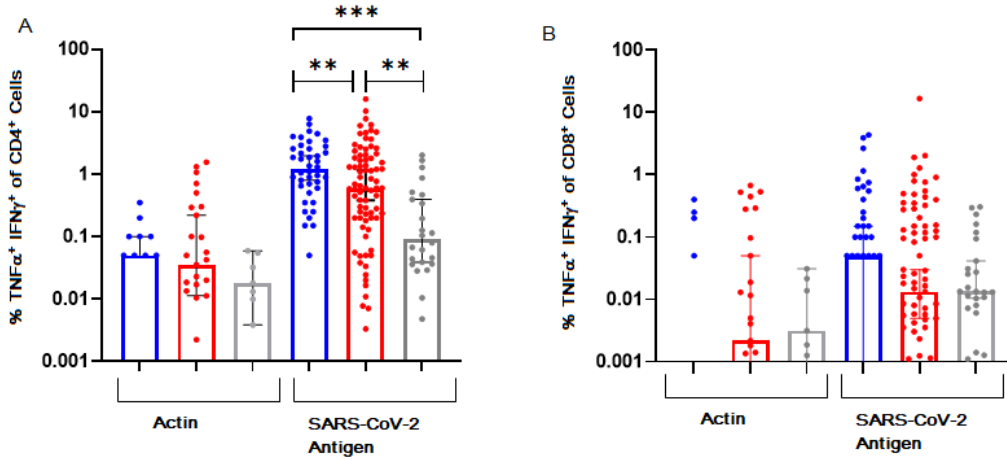

**Supplemental Figure 1. CST response among CD4<sup>+</sup> and CD8<sup>+</sup> T cell subsets.** Percent of (A) CD4<sup>+</sup> and (B) CD8<sup>+</sup> T lymphocytes from convalescent adult (blue), non-MIS-C pediatric (gray), and MIS-C (red) subjects secreting TNF- $\alpha$  and IFN- $\gamma$  when stimulated with actin (negative control) or viral antigen post expansion in the presence of viral peptides. Actin = negative control. \*\*\*:  $p < 0.0001$ , \*\*:  $p < 0.05$ . Column = median, error bars = 95% CI.

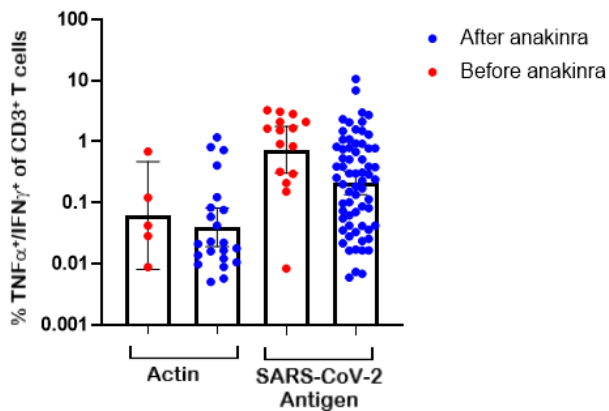

**Supplemental Figure 2. Effect of anakinra on CST expansion.** Magnitude of CST expansion from samples drawn before (red) and after (blue) anakinra treatment (1.39% versus 0.78%,  $p = 0.16$ ). Boxes: geometric mean, whiskers: 95% CI around geometric mean.

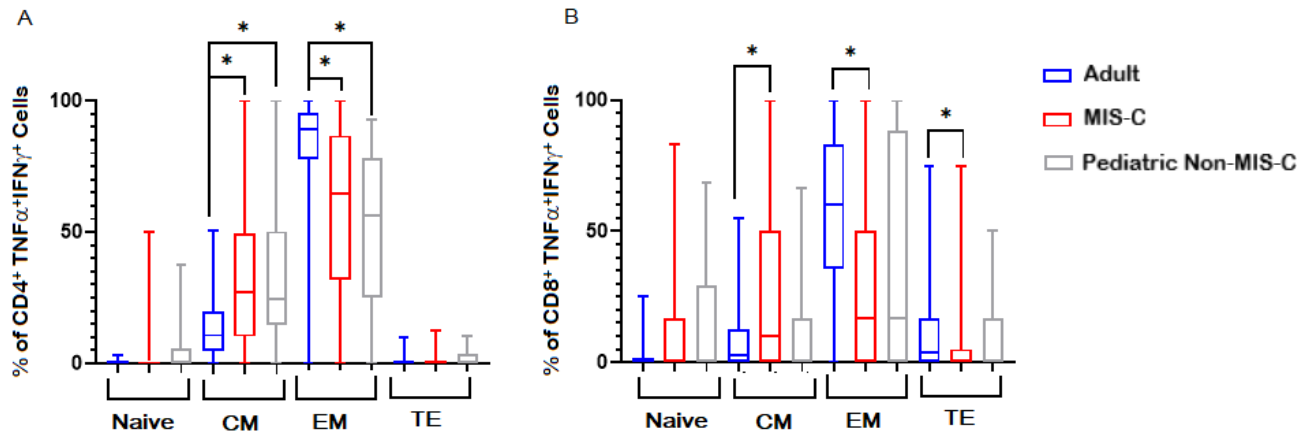

**Supplemental Figure 3. Memory phenotype of CST Subsets.** Percent of (A) CD4+ and (B) CD8+ CSTs expressing markers of T cell memory consistent with naïve ( $CCR7^+CD45RO^-$ ), central memory (CM) ( $CCR7^+CD45RO^+$ ), effector memory (EM) ( $CCR7^-CD45RO^+$ ), and terminal effector (TE) ( $CCR7^-CD45RO^-$ ) phenotype. Boxes: interquartile range, lines: median, whiskers: minimum to maximum, \*:  $p < 0.05$ .

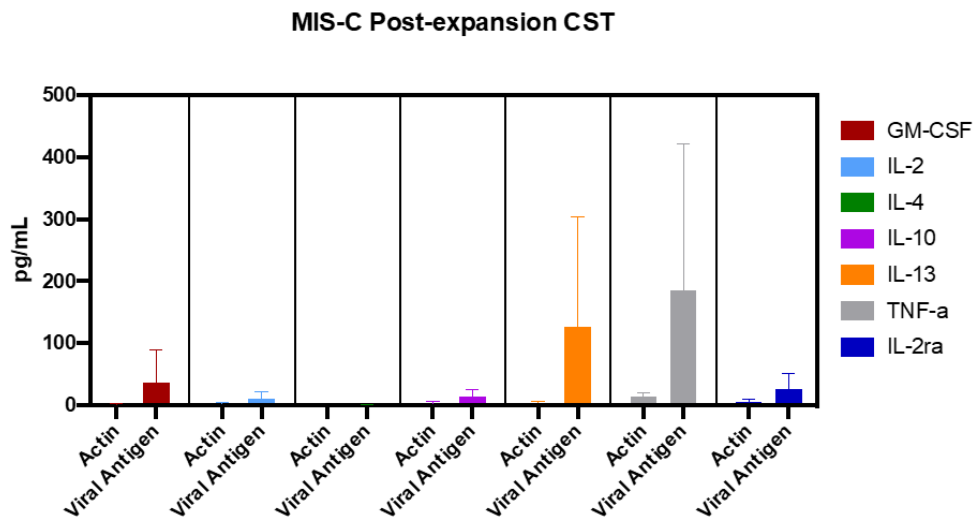

**Supplemental Figure 4. MIS-C sample post-expansion cytokine secretion.** SARS-CoV-2-specific cytokine production in CSTs from MIS-C patients following 10-day expansion.

Differences between combined SARS-CoV-2 antigen and actin restimulation were significant for all displayed cytokines ( $p < 0.05$ ). Boxes: mean values; whiskers: standard deviation.

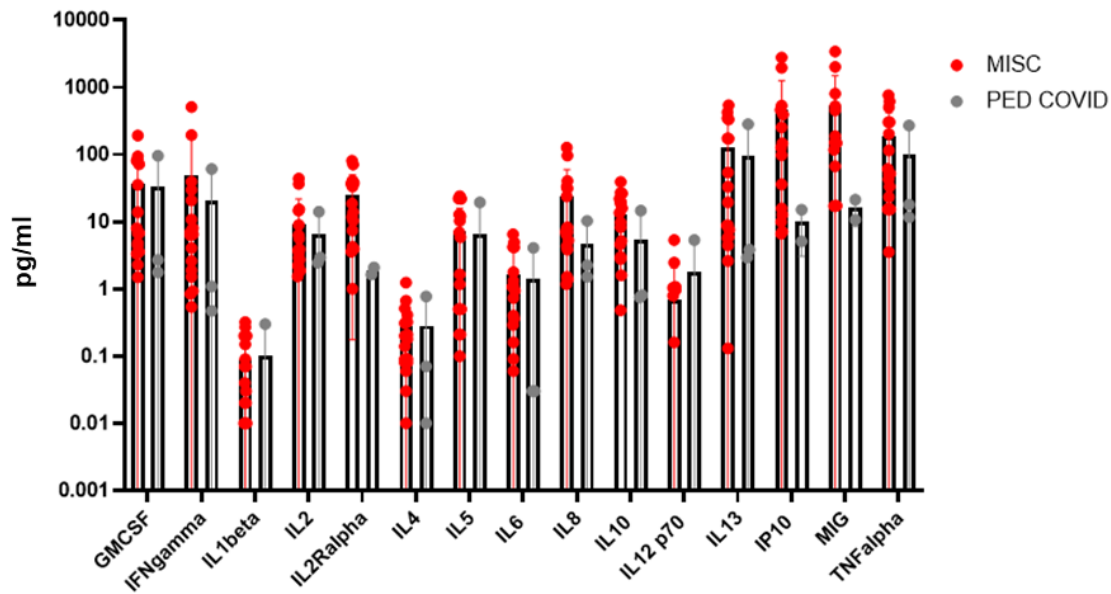

**Supplemental Figure 5. MIS-C versus non-MIS-C pediatric post-expansion cytokine**

**secretion.** Comparison of SARS-CoV-2-specific cytokine production in pediatric patients with MIS-C (red) vs uncomplicated COVID-19 (gray) following 10-day expansion. Differences were not statistically significant. Boxes: mean values; whiskers: standard deviation.

|   | HLA-A      | HLA-A      | HLA-B      | HLA-B      | HLA-C      | HLA-C      | DRB1       | DRB1       | DRB3       | DRB3       | DRB4             | DRB4             | DRB5       | DQB1        | DQB1       | DQA1        | DQA1        | DPB1        | DPB1        | DDP1        | DDP1       |
|---|------------|------------|------------|------------|------------|------------|------------|------------|------------|------------|------------------|------------------|------------|-------------|------------|-------------|-------------|-------------|-------------|-------------|------------|
| M | 02:07:0101 | 11:02:0101 | 46:01:0101 | 46:01:0101 | 01:02:0101 | 01:02:0101 | 09:01:0201 | 14:04:0101 | 02:02:0106 |            | 01:03:01:05      |                  |            | 03:03:0202  | 06:01:0101 | 01:04:0101  | 03:02:0102  | 02:01:0201  | 05:01:01:01 | 01:03:0101  | 02:02:0201 |
| M | 23:17:0101 | 31:01:0213 | 53:01:0101 | 58:02:0101 | 04:01:0101 | 06:02:0101 | 07:01:0101 | 13:01:0101 |            |            | 01:03:01:01      |                  |            | 02:02:0101  | 03:03:0201 | 02:01:0101  | 03:03:0109  | 04:01:0101  | 18:01:01:01 | 01:03:0102  | 01:03:0102 |
| M | 03:01:0107 | 30:02:0103 | 49:01:0101 | 57:03:0101 | 07:01:0101 | 07:18:0101 | 15:03:0101 | 15:78      |            |            |                  |                  | 01:01:0102 | 06:02:0101  | 06:02:0101 | 01:02:0101  | 01:02:0101  | 18:01:01:01 | 18:01:01:01 | 01:03:0102  | 01:03:0102 |
| M | 02:01:0101 | 30:02:0102 | 45:01:0101 | 45:01:0101 | 16:01:0101 | 16:01:0102 | 01:02:0101 | 08:06      |            |            |                  |                  |            | 03:01:0105  | 05:01:0101 | 01:01:0201  | 05:05:0103  | 01:01:0101  | 18:01:01:01 | 01:03:0102  | 02:02:0204 |
| M | 02:01:0101 | 23:01:0101 | 07:02:0101 | 58:11      | 07:02:0101 | 07:02:0101 | 03:02:0101 | 11:02:0101 |            |            |                  |                  |            | 03:01:01:16 | 04:02:0108 | 04:01:0104  | 05:05:01:13 | 01:01:0101  | 01:01:01:01 | 02:02:0204  | 02:02:0204 |
| M | 68:01:0102 | 68:01:0102 | 15:03:0102 | 52:01:0201 | 02:10:0101 | 16:01:0101 | 03:02:0101 | 10:01:0101 |            |            |                  |                  |            | 04:02:0108  | 05:01:0102 | 01:05:0101  | 04:01:0104  | 01:01:0101  | 131:01:0101 | 02:01:01:14 | 02:01:0803 |
| M | 24:02:0101 | 34:02:0101 | 07:02:0101 | 44:02:0101 | 05:01:0102 | 15:05:0201 | 01:01:0101 | 15:03:0101 |            |            |                  |                  | 01:01:0102 | 05:01:0103  | 06:02:0101 | 01:01:0101  | 01:02:0101  | 13:01:0101  | 105:01:0101 | 02:01:0106  | 03:01:0105 |
| M | 01:01:0101 | 29:02:0101 | 40:02:0101 | 44:03:0101 | 03:05      | 04:01:0101 | 04:07:0101 | 07:01:0101 |            |            | 01:03:01:02<br>N | 01:03:02         |            | 03:02:0101  | 03:03:0201 | 02:01:0101  | 03:01:0101  | 04:01:0101  | 04:02:01:02 | 01:03:0102  | 01:03:0105 |
| M | 01:01:0101 | 03:01:0101 | 14:02:0101 | 40:01:0101 | 08:02:0101 | 17:01:0105 | 11:02:0101 | 15:01:0101 | 02:02:0101 |            |                  |                  |            | 03:19:0101  | 06:02:0101 | 01:02:01:10 | 05:05:01:13 | 04:01:0101  | 04:01:01:01 | 01:03:0104  | 01:05      |
| M | 24:02:0101 | 68:03:0101 | 35:01:0102 | 35:17:01   | 04:01:0101 | 07:02:0101 | 01:01:0101 | 14:06:01   |            |            |                  |                  |            | 03:01:0101  | 05:01:0103 | 01:01:0101  | 05:03:0101  | 04:02:0102  | 13:01:0102  | 01:03:0105  | 02:02:0201 |
| M | 02:01:0101 | 32:01:0101 | 35:08:0101 | 50:01:0101 | 04:01:0106 | 06:02:0102 | 03:01:0101 | 07:01:0101 |            |            | 01:03:01:02<br>N |                  |            | 02:01:0101  | 03:03:0201 |             |             | 01:01:0101  | 04:01:01:01 | 01:03:0104  | 02:01:0202 |
| M | 24:02:0101 | 26:01:0101 | 40:02:0101 | 45:01:0101 | 03:05      | 06:02:0103 | 01:01:0101 | 04:07:0101 |            |            | 01:03:01:01      |                  |            | 03:02:0101  | 05:01:0103 | 01:01:0101  | 03:01:0101  | 02:01:02:10 | 04:02:01:02 | 01:03:0102  | 01:03:0105 |
| M | 02:01:0101 | 68:01:0102 | 35:03:0101 | 55:01:0101 | 03:03:0101 | 04:01:0101 | 8:01:01    | 16:01:01   |            |            |                  |                  |            | 04:02:0104  | 05:02:0101 | 01:02:0201  | 04:01:0101  | 03:01:0101  | 04:01:01:01 | 01:03:0102  | 01:03:0104 |
| M | 29:02:0101 | 33:01:0101 | 14:02:0101 | 58:01:0101 | 07:18:0101 | 08:02:0101 | 01:02:0101 | 08:04:01   |            |            |                  |                  |            | 04:02:0108  | 05:01:0101 | 01:01:0201  | 04:01:01:27 | 104:01:0101 | 01:03:0102  | 01:03:0102  | 01:03:0104 |
| M | 02:05:0101 | 24:38      | 35:01:0102 | 35:02:0101 | 03:04:0102 | 04:01:0106 | 04:07:0101 | 11:04:0101 | 02:02:0102 |            | 01:03:01:01      |                  |            | 03:01:0102  | 03:02:0101 | 03:01:0101  | 05:05:0101  | 04:02:0102  | 14:01:01:01 | 01:03:0105  | 02:01:0102 |
| M | 02:01:0101 | 24:02:0101 | 07:02:0101 | 35:17:01   | 04:01:0101 | 07:02:0103 | 04:07:0101 | 15:01:0101 |            |            | 01:03:01:01      |                  |            | 03:02:0101  | 06:02:0101 | 01:02:0101  | 03:01:0101  | 04:02:0102  | 05:01:01:01 | 01:03:0105  | 02:02:0201 |
| M | 01:01:0101 | 02:01:0101 | 35:02:0101 | 35:12:0101 | 04:01:0101 | 04:01:0106 | 08:02:0101 | 11:04:0101 | 02:02:0102 | 02:02:11   |                  |                  |            | 04:02:0104  | 06:03:0101 | 01:03:0102  | 04:01:0101  | 02:01:0201  | 04:02:01:02 | 01:03:0105  | 02:01:0102 |
| M | 02:01:0101 | 68:03:0101 | 35:01:0102 | 35:17:01   | 04:01:0101 | 07:02:0101 | 04:07:0101 | 04:11:01   |            |            | 01:03:01:01      |                  |            | 03:02:0101  | 04:02:0109 | 03:01:0101  | 03:03:0106  | 04:02:0102  | 04:02:01:02 | 01:03:0105  | 01:03:0105 |
| M | 01:01:0101 | 02:01:0101 | 08:01:0101 | 41:02:0101 | 07:01:0101 | 17:03:0102 |            |            |            |            |                  |                  |            |             |            |             |             | 04:01:0101  | 04:01:01:03 | 01:03:0102  | 01:03:0104 |
| M | 24:02:0101 | 25:01:0101 | 18:01:0102 | 35:05:0102 | 04:01:0101 | 12:03:0101 | 04:310     | 13:02:03   |            |            | 01:03:01:01      |                  | 01:01:0101 | 03:02:0101  | 06:02:0101 | 01:02:01:10 | 03:01:0101  | 02:01:0201  | 04:01:01:01 | 01:03:0102  | 02:01:0102 |
| M | 01:01:0101 | 68:03:0101 | 39:05:0101 | 57:01:0101 | 06:02:0101 | 07:02:0101 | 04:07:0101 | 07:01:0101 |            |            | 01:03:01:01      | 01:03:01:02<br>N |            | 03:02:0101  | 03:03:0201 | 02:01:0101  | 03:01:0101  | 04:01:0101  | 04:02:01:02 | 01:03:0102  | 01:03:0105 |
| P | 02:02:0101 | 23:01:0101 | 15:16:0102 | 42:01:0101 | 14:02:0102 | 17:01:0102 | 11:01:0201 | 15:03:0101 | 02:02:0105 |            |                  |                  | 01:01:0102 | 06:02:0101  | 06:02:0104 | 01:02:0101  | 01:02:0101  | 01:01:0101  | 18:01:01:01 | 01:03:0102  | 02:01:0202 |
| P | 02:01:0101 | 33:03:0101 | 40:64:0102 | 44:03:0101 | 03:04:0102 | 04:01:0101 | 08:04:03   | 15:03:0101 |            |            |                  |                  | 01:01:0102 | 04:02:0104  | 06:02:0101 | 01:02:0101  | 04:01:0101  | 18:01:0101  | 105:01:0105 | 01:03:0102  | 01:03:0105 |
| P | 30:01:0101 | 74:01:0101 | 42:01:0101 | 45:01:0101 | 16:01:0101 | 17:01:0102 | 08:04:01   | 13:03:0101 |            |            |                  |                  |            | 03:01:0101  | 03:19:0101 | 04:01:0201  | 05:05:0101  | 01:01:0101  | 69:01:01:01 | 02:01:0101  | 02:01:0803 |
| P | 29:02:0102 | 32:01:0101 | 27:05:0201 | 45:01:0101 | 05:01:0102 | 06:02:0103 | 03:01:0101 | 04:01:0101 |            |            | 01:03:01:01      |                  |            | 02:01:0101  | 03:01:0101 | 03:03:0101  | 05:01:0102  | 01:01:0101  | 04:01:01:01 | 01:03:0102  | 02:01:0202 |
| P | 01:01:0101 | 25:01:0101 | 18:01:0102 | 57:01:0101 | 06:02:0101 | 12:03:0101 | 07:01:0101 | 15:01:0101 |            |            | 01:03:01:01      | 01:03:01:02<br>N | 01:01:0101 | 03:03:0201  | 06:02:0101 | 01:02:0101  | 02:01:0101  | 02:01:0201  | 23:01:01:01 | 01:03:0101  | 01:03:0104 |
| P | 24:02:0101 | 68:02:0101 | 51:01:0101 | 57:03:0102 | 07:01:0201 | 15:02:0101 | 03:02:0101 | 11:01:0101 | 02:02:0102 | 03:01:0101 |                  |                  |            | 03:01:0103  | 04:02:0108 | 04:01:0104  | 05:05:0101  | 01:01:0101  | 04:01:01:01 | 01:03:0104  | 02:02:0204 |
| P | 03:01:0101 | 26:01:0101 | 07:02:0101 | 40:02:0101 | 02:02:0201 | 07:02:0103 | 11:04:0101 | 13:01:0101 | 01:76      | 02:02:0102 |                  |                  |            | 03:01:0103  | 06:03:0101 | 01:03:0102  | 05:05:0101  | 02:02:0101  | 104:01:0101 | 01:03:0101  | 01:03:0102 |

**Supplemental Table 1. HLA Sequences.** Traditional HLA allele sequences for MIS-C (N = 21) and non-MIS-C (N = 7) pediatric subjects. M = MIS-C, P = pediatric non-MIS-C.
